# Supplementary material for: Structural and spectroscopic insight into the metal binding properties of the o-aminophenol-N,N,O-triacetic acid (APTRA) chelator: implications for design of metal indicators
Source: Royal Society of Chemistry journal article supplement (doi:10.1039/c6dt01557c), 2016-01-01
Supplement: c6dt01557c1.pdf [file c6dt01557c1.pdf]

## SUPPORTING INFORMATION

### **Structural and Spectroscopic Insight into Metal Binding Properties of *o*-Aminophenol-*N,N,O*-Triacetic Acid (APTRA) Chelator: Implications for Design of Metal Indicators**

*Michael Brady, Sebastian D. Piombo, Chunhua Hu and Daniela Buccella\**

Department of Chemistry, New York University, New York, New York 10003

#### **Table of Contents**

|                                                                                                           |   |
|-----------------------------------------------------------------------------------------------------------|---|
| S1. Supporting Figures and Tables                                                                         | 2 |
| S2. Space Group Determination of $[\text{Zn}(\text{OH}_2)_6][(\text{APTRA})\text{Zn}]_2$                  | 6 |
| S3. Spectrophotometric Determination of Metal Binding Constants                                           | 8 |
| S3.1 Spectrophotometric Determination of $\text{Mg}^{2+}$ and $\text{Ca}^{2+}$ Apparent Binding Constants | 8 |
| S3.2 Spectrophotometric Determination of $\text{Zn}^{2+}$ Apparent Binding Constant                       | 8 |
| S4. HPLC data for hydrolysis of APTRA trimethyl ester                                                     | 9 |
| S5. References                                                                                            | 9 |

## S1. Supporting Figures and Tables

**Table S1.** Crystal intensity, collection and refinement data for APTRA complexes of  $\text{Mg}^{2+}$ ,  $\text{Ca}^{2+}$ ,  $\text{Zn}^{2+}$  and  $\text{K}^+$ .

|                                         | $[\text{Mg}(\text{OH}_2)_6][(\text{APTRA})\text{Mg}]_2 \cdot 6(\text{H}_2\text{O})(\text{dioxane})$ | $[\text{Ca}(\text{OH}_2)_3]_2\{[(\text{APTRA})\text{Ca}(\text{OH}_2)]_2(\mu\text{-H}_2\text{O})_2\}\text{Cl} \cdot 2(\text{H}_2\text{O})$ | $[\text{Zn}(\text{OH}_2)_6][(\text{APTRA})\text{Zn}]_2 \cdot 6(\text{H}_2\text{O})(\text{dioxane})$ |
|-----------------------------------------|-----------------------------------------------------------------------------------------------------|-------------------------------------------------------------------------------------------------------------------------------------------|-----------------------------------------------------------------------------------------------------|
| Crystal Lattice                         | Monoclinic                                                                                          | Triclinic                                                                                                                                 | Monoclinic                                                                                          |
| Formula                                 | $\text{C}_{28}\text{H}_{52}\text{Mg}_3\text{N}_2\text{O}_{28}$                                      | $\text{C}_{12}\text{H}_{22}\text{Ca}_2\text{ClNO}_{13}$                                                                                   | $\text{C}_{28}\text{H}_{52}\text{N}_2\text{O}_{28}\text{Zn}_3$                                      |
| Formula weight                          | 937.64                                                                                              | 524.0                                                                                                                                     | 1060.89                                                                                             |
| Space group                             | $C2/c$                                                                                              | $P\bar{1}$                                                                                                                                | $P2_1/n$                                                                                            |
| $a/\text{\AA}$                          | 24.2955(12)                                                                                         | 8.4079(5)                                                                                                                                 | 9.2960(3)                                                                                           |
| $b/\text{\AA}$                          | 9.4801(4)                                                                                           | 11.2214(7)                                                                                                                                | 18.4231(7)                                                                                          |
| $c/\text{\AA}$                          | 18.5395(9)                                                                                          | 12.0301(8)                                                                                                                                | 24.4820(9)                                                                                          |
| $\alpha/^\circ$                         | 90                                                                                                  | 108.3734(10)                                                                                                                              | 90                                                                                                  |
| $\beta/^\circ$                          | 103.9470(10)                                                                                        | 104.9899(10)                                                                                                                              | 90.0021(6)                                                                                          |
| $\gamma/^\circ$                         | 90                                                                                                  | 96.6152(11)                                                                                                                               | 90                                                                                                  |
| $V/\text{\AA}^3$                        | 4144.2(3)                                                                                           | 1016.26(11)                                                                                                                               | 4192.8(3)                                                                                           |
| Z                                       | 4                                                                                                   | 2                                                                                                                                         | 4                                                                                                   |
| Temperature (K)                         | 100(2)                                                                                              | 100(2)                                                                                                                                    | 100(2)                                                                                              |
| Radiation ( $\lambda$ , $\text{\AA}$ )  | 0.71073                                                                                             | 0.71073                                                                                                                                   | 0.71073                                                                                             |
| $\rho$ (calcd.), $\text{g cm}^{-3}$     | 1.503                                                                                               | 1.647                                                                                                                                     | 1.681                                                                                               |
| $\mu$ (Mo $K\alpha$ ), $\text{mm}^{-1}$ | 0.174                                                                                               | 0.758                                                                                                                                     | 1.802                                                                                               |
| $\theta$ max, deg.                      | 28.287                                                                                              | 28.283                                                                                                                                    | 28.305                                                                                              |
| Completeness to $\theta$ (%)            | 100                                                                                                 | 100                                                                                                                                       | 100                                                                                                 |
| No. of data                             | 9928                                                                                                | 15949                                                                                                                                     | 10445                                                                                               |
| No. of parameters                       | 314                                                                                                 | 298                                                                                                                                       | 612                                                                                                 |
| No. of restraints                       | 19                                                                                                  | 13                                                                                                                                        | 88                                                                                                  |
| $R_1 [I > 2\sigma(I)]$                  | 0.0399                                                                                              | 0.0435                                                                                                                                    | 0.0428                                                                                              |
| $wR_2[\text{all refs}]$                 | 0.0953                                                                                              | 0.1057                                                                                                                                    | 0.1241                                                                                              |
| GOF $[I > 2\sigma(I)]$                  | 1.025                                                                                               | 1.020                                                                                                                                     | 1.053                                                                                               |

**Table S1 (contd).** Crystal intensity, collection and refinement data for APTRA complexes of  $\text{Mg}^{2+}$ ,  $\text{Ca}^{2+}$ ,  $\text{Zn}^{2+}$  and  $\text{K}^+$ .

|                                          | (H <sub>2</sub> APTRA)K                           |
|------------------------------------------|---------------------------------------------------|
| Crystal Lattice                          | Monoclinic                                        |
| Formula                                  | C <sub>12</sub> H <sub>12</sub> NO <sub>7</sub> K |
| Formula weight                           | 321.33                                            |
| Space group                              | <i>P</i> 2 <sub>1</sub> / <i>c</i>                |
| <i>a</i> /Å                              | 12.6083(7)                                        |
| <i>b</i> /Å                              | 12.3265(7)                                        |
| <i>c</i> /Å                              | 8.9860(5)                                         |
| $\alpha$ /°                              | 90                                                |
| $\beta$ /°                               | 104.5060(10)                                      |
| $\gamma$ /°                              | 90                                                |
| <i>V</i> /Å <sup>3</sup>                 | 1352.05(13)                                       |
| <i>Z</i>                                 | 4                                                 |
| Temperature (K)                          | 100(2)                                            |
| Radiation ( $\lambda$ , Å)               | 0.71073                                           |
| $\rho$ (calcd.), g cm <sup>-3</sup>      | 1.579                                             |
| $\mu$ (Mo K $\alpha$ ), mm <sup>-1</sup> | 0.427                                             |
| $\theta$ max, deg.                       | 28.39                                             |
| Completeness to $\theta$ (%)             | 100                                               |
| No. of data                              | 3381                                              |
| No. of parameters                        | 201                                               |
| No. of restraints                        | 1                                                 |
| $R_1$ [ $I > 2\sigma(I)$ ]               | 0.0309                                            |
| $wR_2$ [all refs]                        | 0.0748                                            |
| GOF [ $I > 2\sigma(I)$ ]                 | 1.038                                             |

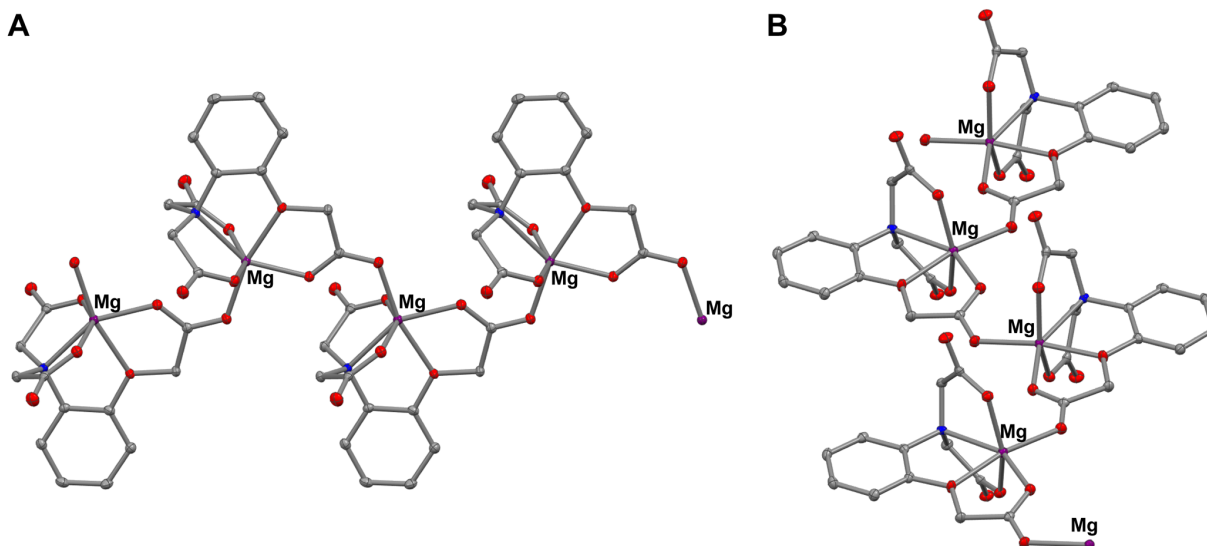

**Figure S1.** Crystal structure of  $[\text{Mg}(\text{OH}_2)_6][(\text{APTRA})\text{Mg}]_2$ , showing the extended chain formed by carboxylate bridging of  $[(\text{APTRA})\text{Mg}]^+$  units in the solid state. Hydrogen atoms omitted for clarity. Thermal ellipsoids shown at 50% probability. (A) View down crystallographic  $a$  axis. (B) Alternate view.

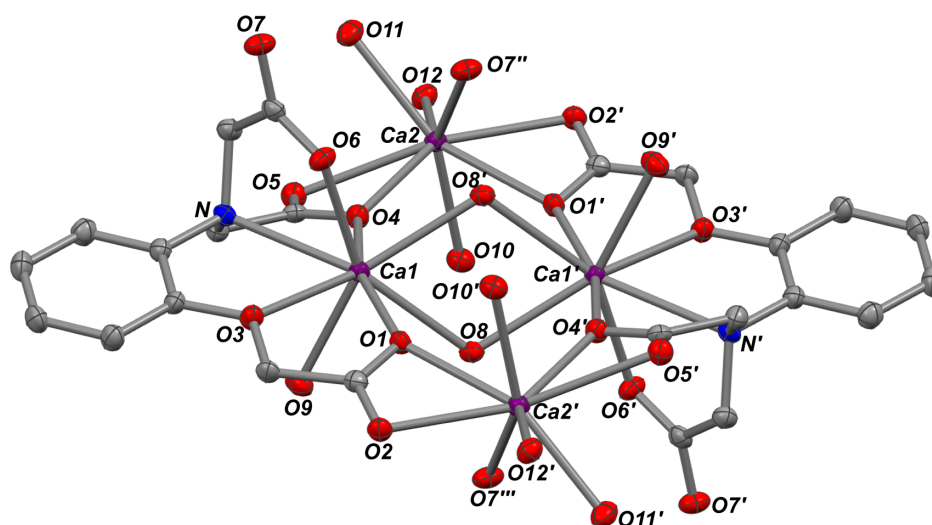

**Figure S2.** Crystal structure of  $\{[\text{Ca}(\text{OH}_2)_3]_2\{[(\text{APTRA})\text{Ca}(\text{OH}_2)]_2(\mu\text{-H}_2\text{O})_2\}\}^{2-}$  anion. Hydrogen atoms omitted for clarity. Thermal ellipsoids shown at 50% probability.

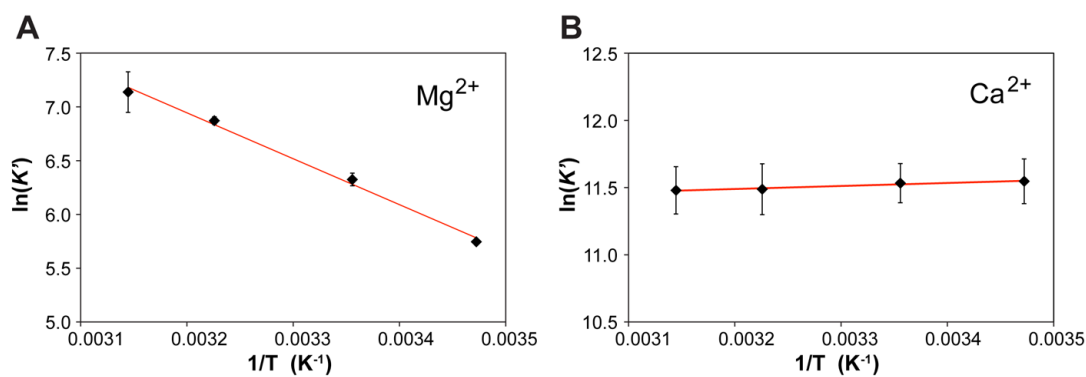

**Figure S3.** Van't Hoff plots for the binding of APTRA to (A)  $Mg^{2+}$ , and (B)  $Ca^{2+}$  at pH 7.0

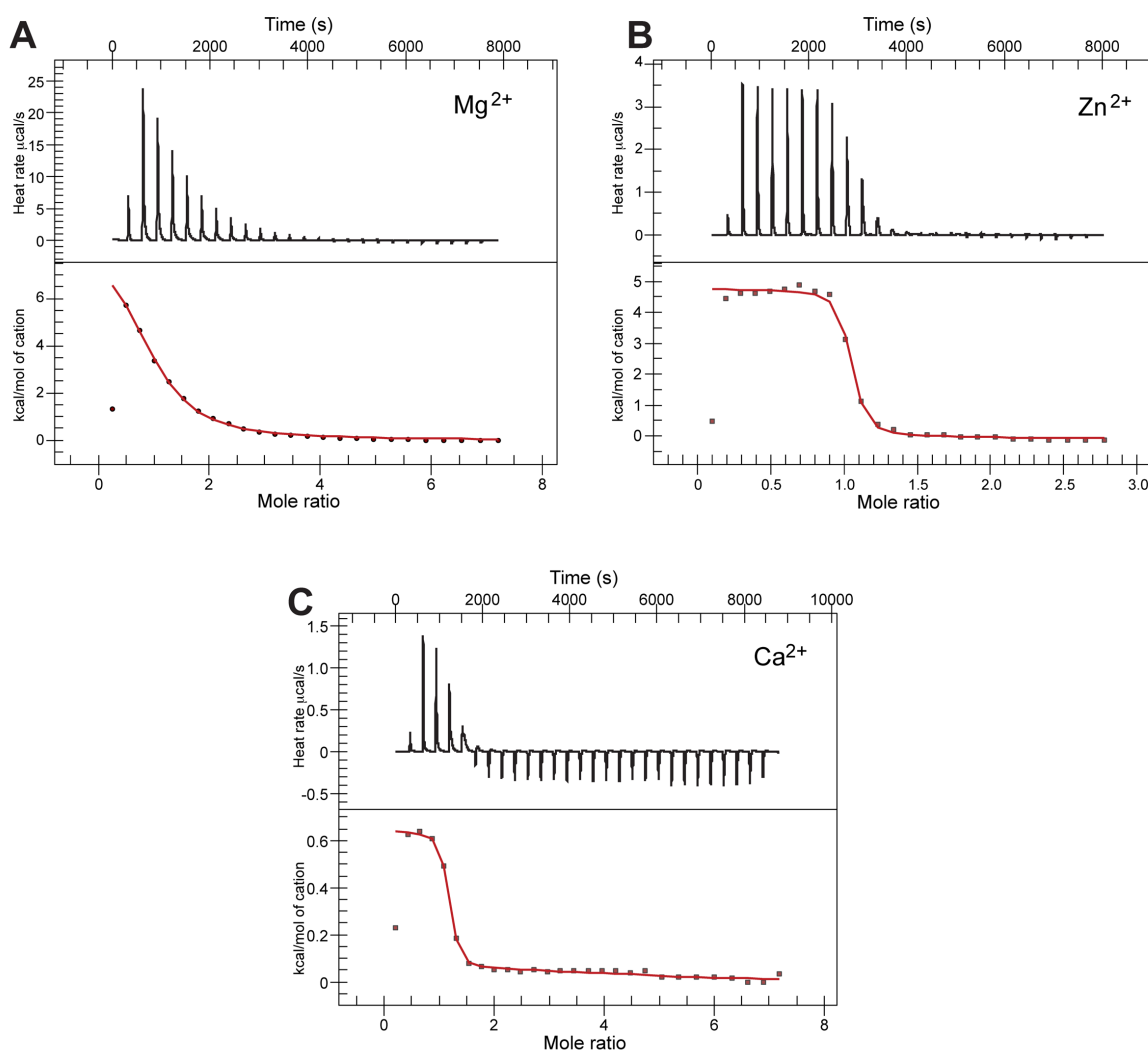

**Figure S4.** Representative ITC curves of APTRA treated with (A)  $MgCl_2$ , (B)  $ZnCl_2$  or (C)  $CaCl_2$ . Values of  $\Delta H$  for the binding reported in the manuscript correspond to averages of three measurements.

## S2. Space Group Determination of $[\text{Zn}(\text{OH}_2)_6][(\text{APTRA})\text{Zn}]_2$

1) 318 reflections violate the systematic absence in the space group of  $Pnma$ , which indicates the  $a$  glide plane is a pseudo symmetry. The correct space group is  $P2_1/n$  in monoclinic. Some violating reflections are listed below.

| h  | k | l | Fo <sup>2</sup> | Sigma | Why rejected                                 |
|----|---|---|-----------------|-------|----------------------------------------------|
| 3  | 3 | 0 | 0.60            | 0.13  | observed but should be systematically absent |
| 3  | 3 | 0 | 0.44            | 0.11  | observed but should be systematically absent |
| 3  | 3 | 0 | 0.60            | 0.09  | observed but should be systematically absent |
| 3  | 3 | 0 | 0.48            | 0.09  | observed but should be systematically absent |
| 3  | 3 | 0 | 0.41            | 0.08  | observed but should be systematically absent |
| 3  | 3 | 0 | 0.32            | 0.08  | observed but should be systematically absent |
| 3  | 3 | 0 | 0.34            | 0.08  | observed but should be systematically absent |
| 3  | 3 | 0 | 0.34            | 0.08  | observed but should be systematically absent |
| 3  | 4 | 0 | 0.57            | 0.09  | observed but should be systematically absent |
| 3  | 4 | 0 | 0.61            | 0.10  | observed but should be systematically absent |
| 3  | 4 | 0 | 0.70            | 0.14  | observed but should be systematically absent |
| 3  | 4 | 0 | 0.73            | 0.14  | observed but should be systematically absent |
| 3  | 4 | 0 | 0.61            | 0.10  | observed but should be systematically absent |
| 3  | 4 | 0 | 0.43            | 0.10  | observed but should be systematically absent |
| 9  | 4 | 0 | 1.04            | 0.24  | observed but should be systematically absent |
| 9  | 4 | 0 | 0.98            | 0.17  | observed but should be systematically absent |
| 9  | 4 | 0 | 0.76            | 0.17  | observed but should be systematically absent |
| 9  | 4 | 0 | 0.90            | 0.22  | observed but should be systematically absent |
| 9  | 4 | 0 | 0.89            | 0.19  | observed but should be systematically absent |
| 5  | 5 | 0 | 0.61            | 0.11  | observed but should be systematically absent |
| 5  | 5 | 0 | 0.67            | 0.12  | observed but should be systematically absent |
| 5  | 5 | 0 | 0.55            | 0.12  | observed but should be systematically absent |
| 5  | 5 | 0 | 0.58            | 0.12  | observed but should be systematically absent |
| 1  | 6 | 0 | 0.93            | 0.19  | observed but should be systematically absent |
| 11 | 6 | 0 | 1.18            | 0.24  | observed but should be systematically absent |
| 11 | 6 | 0 | 1.15            | 0.24  | observed but should be systematically absent |
| 11 | 6 | 0 | 1.18            | 0.20  | observed but should be systematically absent |
| 11 | 6 | 0 | 1.32            | 0.20  | observed but should be systematically absent |
| 11 | 6 | 0 | 1.03            | 0.20  | observed but should be systematically absent |
| 11 | 6 | 0 | 1.73            | 0.30  | observed but should be systematically absent |
| 11 | 6 | 0 | 0.88            | 0.19  | observed but should be systematically absent |
| 11 | 6 | 0 | 1.52            | 0.30  | observed but should be systematically absent |
| 1  | 7 | 0 | 0.75            | 0.15  | observed but should be systematically absent |
| 1  | 7 | 0 | 0.65            | 0.15  | observed but should be systematically absent |
| 1  | 7 | 0 | 0.86            | 0.17  | observed but should be systematically absent |
| 1  | 7 | 0 | 0.69            | 0.14  | observed but should be systematically absent |
| 1  | 7 | 0 | 0.67            | 0.14  | observed but should be systematically absent |
| 1  | 7 | 0 | 0.90            | 0.17  | observed but should be systematically absent |

|   |   |   |      |      |                                              |
|---|---|---|------|------|----------------------------------------------|
| 1 | 7 | 0 | 0.63 | 0.15 | observed but should be systematically absent |
| 3 | 7 | 0 | 2.74 | 0.20 | observed but should be systematically absent |
| 3 | 7 | 0 | 2.24 | 0.19 | observed but should be systematically absent |
| 3 | 7 | 0 | 2.53 | 0.20 | observed but should be systematically absent |
| 3 | 7 | 0 | 3.02 | 0.27 | observed but should be systematically absent |
| 3 | 7 | 0 | 2.87 | 0.20 | observed but should be systematically absent |
| 3 | 7 | 0 | 2.98 | 0.19 | observed but should be systematically absent |
| 3 | 7 | 0 | 4.30 | 0.30 | observed but should be systematically absent |
| 3 | 7 | 0 | 3.11 | 0.25 | observed but should be systematically absent |
| 3 | 7 | 0 | 2.89 | 0.25 | observed but should be systematically absent |
| 7 | 7 | 0 | 1.95 | 0.19 | observed but should be systematically absent |
| 7 | 7 | 0 | 1.73 | 0.19 | observed but should be systematically absent |

\*\* etc. \*\*

66051 Reflections read, of which 3081 rejected

-24 ≤ h ≤ 24, -32 ≤ k ≤ 32, -12 ≤ l ≤ 12, Max. 2-theta = 56.59

318 Systematic absence violations

2) As an example the reflection 3 3 0 was found in the diffraction images, which verifies the incorrectness of the orthorhombic space group of *Pnma*.

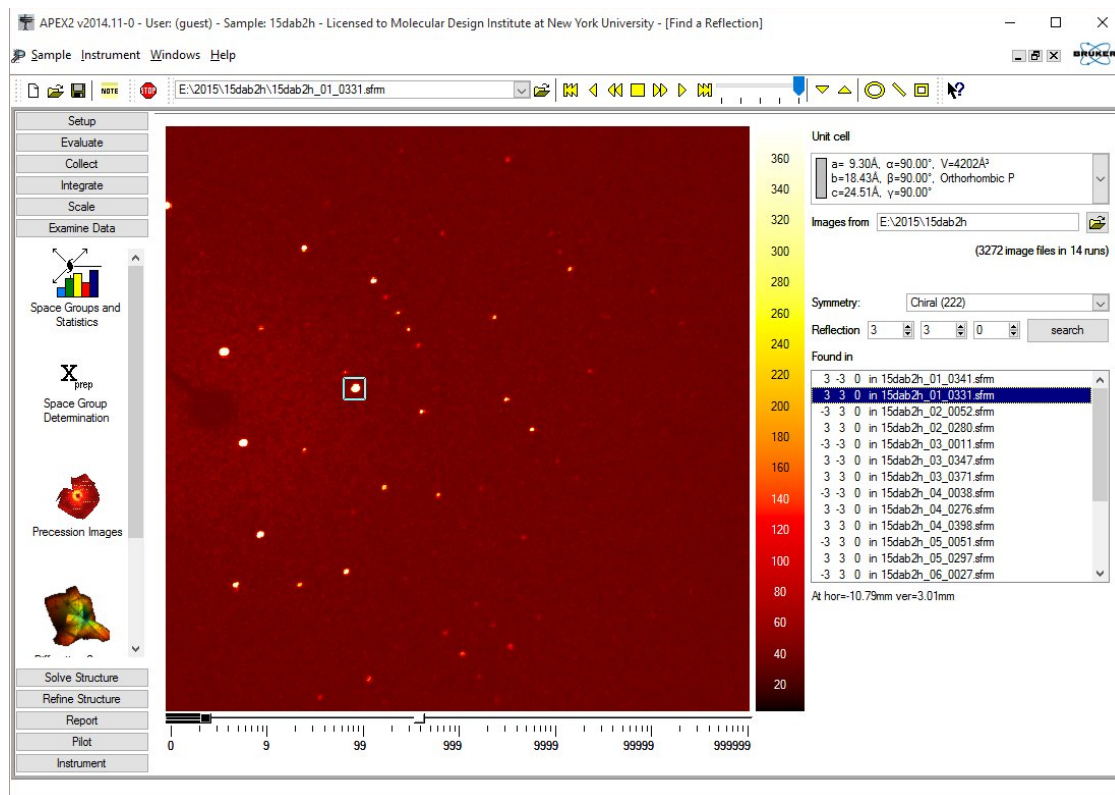

**Figure S5.** Reflection 3 3 0 found in the diffraction image

### S3. Spectrophotometric Determination of Metal Binding Constants

#### S3.1 Spectrophotometric Determination of $\text{Mg}^{2+}$ and $\text{Ca}^{2+}$ Apparent Binding Constants

Apparent affinity constants  $K'$  for 1:1 stoichiometry metal complexes of APTRA were obtained from non-linear fit of absorbance values at 287 nm,  $A$ , as a function of metal concentration. Data fitting was performed with OriginPro 9.0 software according to equation S1, where  $A_{\max}$  and  $A_{\min}$  represent the absorbance values for the metal-saturated chelator and metal-free chelator at the beginning and the end of the titration, respectively.

$$A = \frac{A_{\min} + A_{\max} K' [\text{M}^{2+}]}{1 + K' [\text{M}^{2+}]} \quad (\text{S1})$$

For  $\text{Mg}^{2+}$  titrations, the approximation  $[\text{Mg}^{2+}] \approx [\text{Mg}^{2+}]_t$  was made. For  $\text{Ca}^{2+}$  titrations, the free metal concentration at each point was obtained from S2<sup>1</sup>

$$K' [\text{Ca}^{2+}]^2 + (1 + [\text{APTRA}]_t K' - [\text{Ca}^{2+}]_t K') [\text{Ca}^{2+}] - [\text{Ca}^{2+}]_t = 0 \quad (\text{S2})$$

#### S3.2 Spectrophotometric Determination of $\text{Zn}^{2+}$ Apparent Binding Constant

Zinc(II) titrations were conducted using an EGTA buffer system. The free metal ion concentration at each point was calculated from the total  $\text{Zn}^{2+}$  concentration,  $[\text{Zn}^{2+}]_t$ , solving equation S3 with an apparent binding constant for  $\text{Zn}^{2+}$ -EGTA of  $\log K'_{\text{ZnEGTA}} = 8.24$  at pH 7.0.

$$K'_{\text{ZnEGTA}} [\text{Zn}^{2+}]^2 + (1 + [\text{EGTA}]_t K'_{\text{ZnEGTA}} - [\text{Zn}^{2+}]_t K'_{\text{ZnEGTA}}) [\text{Zn}^{2+}] - [\text{Zn}^{2+}]_t = 0 \quad (\text{S3})$$

The apparent binding constant was calculated from the absolute stability constant  $\log K_{\text{ZnEGTA}} = 12.6$  (25 °C,  $\mu = 0.1$ ) listed in Martell and Smith,<sup>2</sup> using Schwarzenbach's  $\alpha$  coefficient method, according to the following equation:

$$K'_{\text{ZnEGTA}} = \alpha_{\text{EGTA}} K_{\text{ZnEGTA}} \quad (\text{S4})$$

where  $\alpha_{\text{EGTA}}$  corresponds to the fraction of fully deprotonated EGTA at the pH of interest. The  $\text{p}K_a$  values for EGTA used to calculate  $\alpha_{\text{EGTA}}$  were corrected upwards by 0.11 units to account for the fact that the tabulated  $\text{p}K_a$  values in Martell and Smith<sup>2</sup> are determined using concentration and not activity of the hydrogen ion. According to the National Bureau of



Standards, pH is defined as  $-\log(a_H)$ , where  $a_H$  is  $0.78[H^+]$  at 0.1 M ionic strength. As a result, the  $pK_a$  values for EGTA employed in our calculations were:  $pK_{a1}=9.51$ ,  $pK_{a2}=8.89$ ,  $pK_{a3}=2.77$ ,  $pK_{a4}=2.11$ .

#### S4. HPLC data for hydrolysis of APTRA trimethyl ester

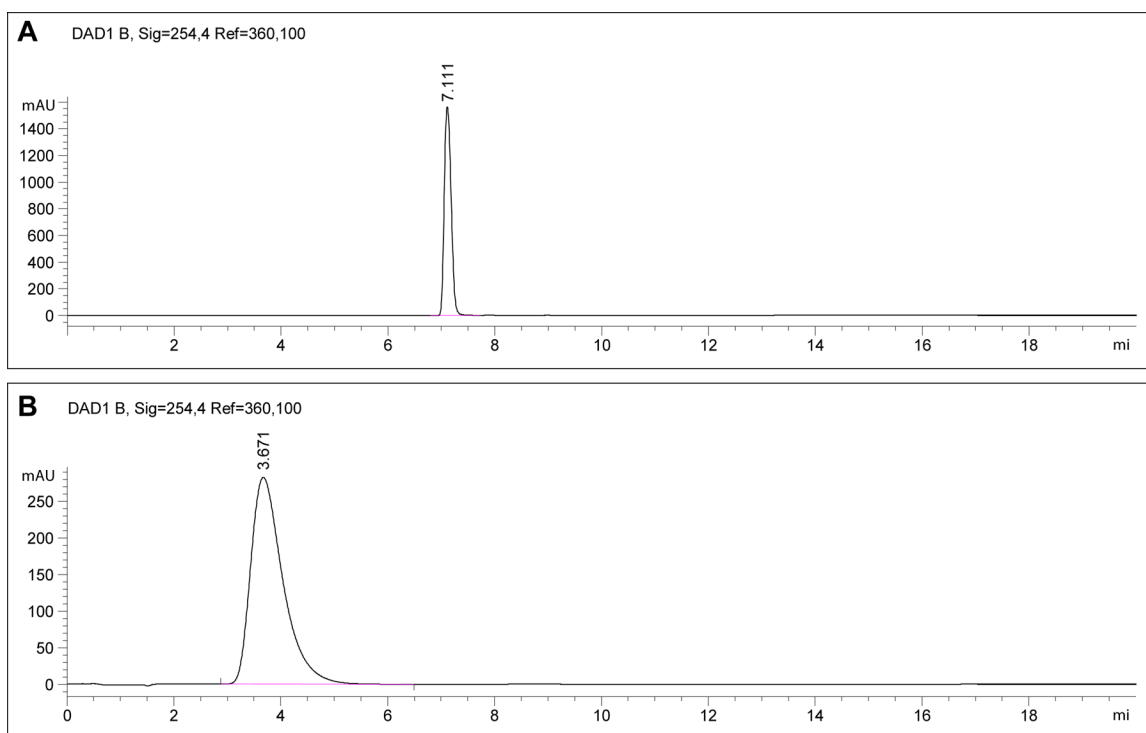

**Figure S6.** HPLC trace of (A) APTRA trimethyl ester and (B) APTRA free acid product of hydrolysis.

#### S5. References

1. A. E. Hargrove, Z. Zhong, J. L. Sessler and E. V. Anslyn, *New J. Chem.*, 2010, **34**, 348-354.
2. A. Martell and R. M. Smith, *Critical Stability Constants. First Supplement*, Plenum Press, New York, 1982.
